# Supplementary material for: Enhanced detection sensitivity through enzyme-induced precipitate accumulation in LSPR-active nano-valleys
Source: Royal Society of Chemistry journal article supplement (doi:10.1039/d2ra01331b), 2022-01-01
Supplement: d2ra01331b1.pdf [file d2ra01331b1.pdf]

**SUPPLEMENTARY INFORMATION**

**Enhanced detection sensitivity through enzyme-induced precipitate accumulation in LSPR-active nano-valleys**

*Su-Heon Kwak*<sup>1,2</sup>, *Jung-Sub Wi*<sup>3</sup>, *Jieon Lee*<sup>4</sup>, *Chunjoong Kim*<sup>1\*</sup>, *Hee-Kyung Na*<sup>2\*</sup>

<sup>1</sup> Department of Materials Science and Engineering, Chungnam National University, Daejeon 34134, Korea

<sup>2</sup> Bio-Imaging Team, Korea Research Institute of Standards and Science (KRISS), Daejeon 34113, Korea

<sup>3</sup> Department of Materials Science and Engineering, Hanbat National University, Daejeon 34158, Korea

<sup>4</sup> Predictive Toxicology Department, Korea Institute of Toxicology (KIT), Daejeon, 34114, Korea

\* Corresponding authors: [ckim0218@cnu.ac.kr](mailto:ckim0218@cnu.ac.kr), [nahk@kriss.re.kr](mailto:nahk@kriss.re.kr)

## Table of Content

|                                                                                        |    |
|----------------------------------------------------------------------------------------|----|
| <b>Figure S1:</b> FDTD simulated electromagnetic field distributions of a DAS .....    | S3 |
| <b>Figure S2:</b> Schematic illustration of the FDTD simulation geometries .....       | S4 |
| <b>Figure S3.</b> SEM images in the absence and presence of miRNA .....                | S5 |
| <b>Figure S4:</b> LSPR peak shift .....                                                | S6 |
| <b>Figure S5:</b> Schematic illustration of the FDTD simulation geometries .....       | S7 |
| <b>Figure S6:</b> UV-Vis spectra of a DAS fabricated with Au deposition at 37.5° ..... | S8 |

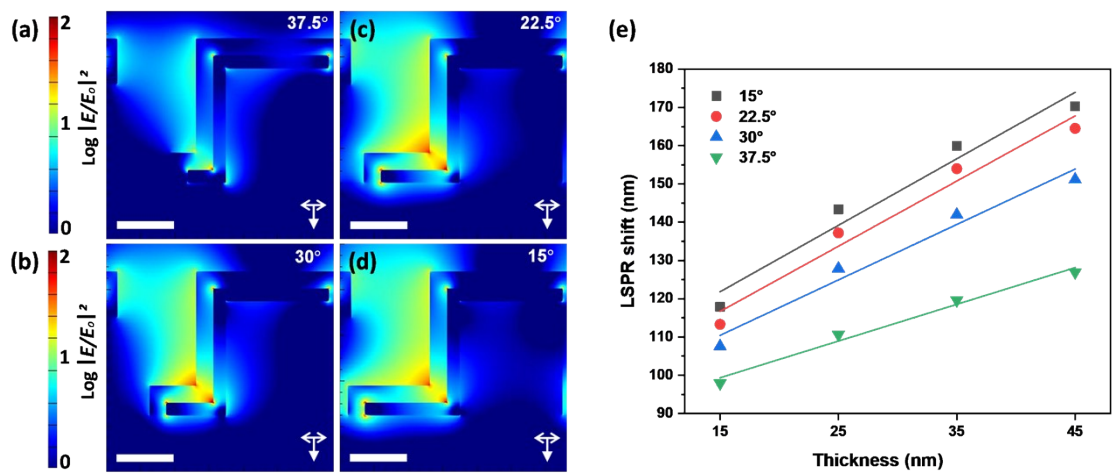

**Fig. S1** (a–d) FDTD simulated electromagnetic field distributions of a DAS fabricated with increasing organic layer thickness from 0 nm to 15 nm at different Au deposition angles and (e) corresponding LSPR sensitivity. Scale bars are 50 nm.

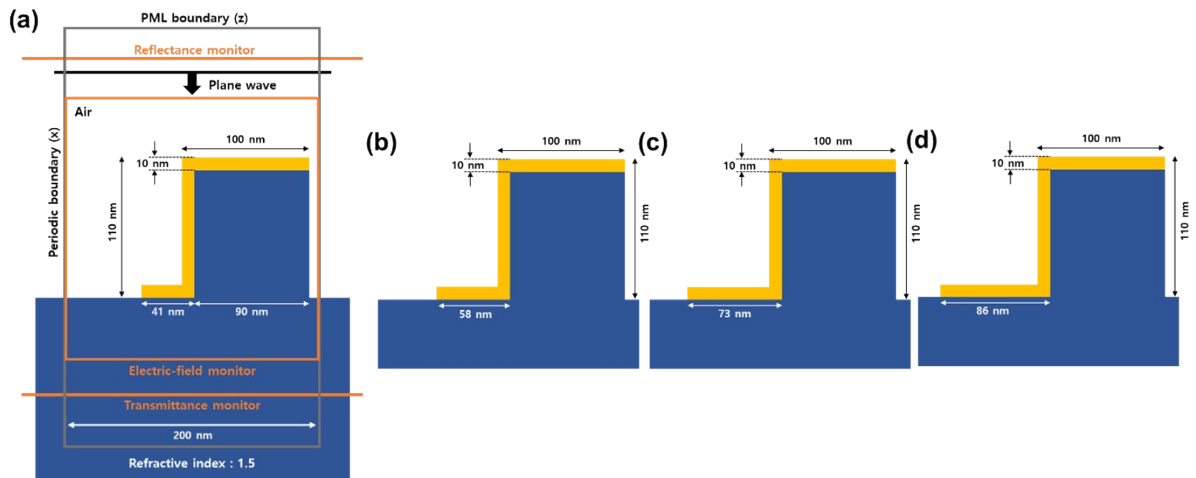

**Fig. S2** (a–d) Schematic illustration of the FDTD simulation geometries for the electromagnetic field distributions of a double-bent Au strip with varying Au-deposited areas from different deposition angles.

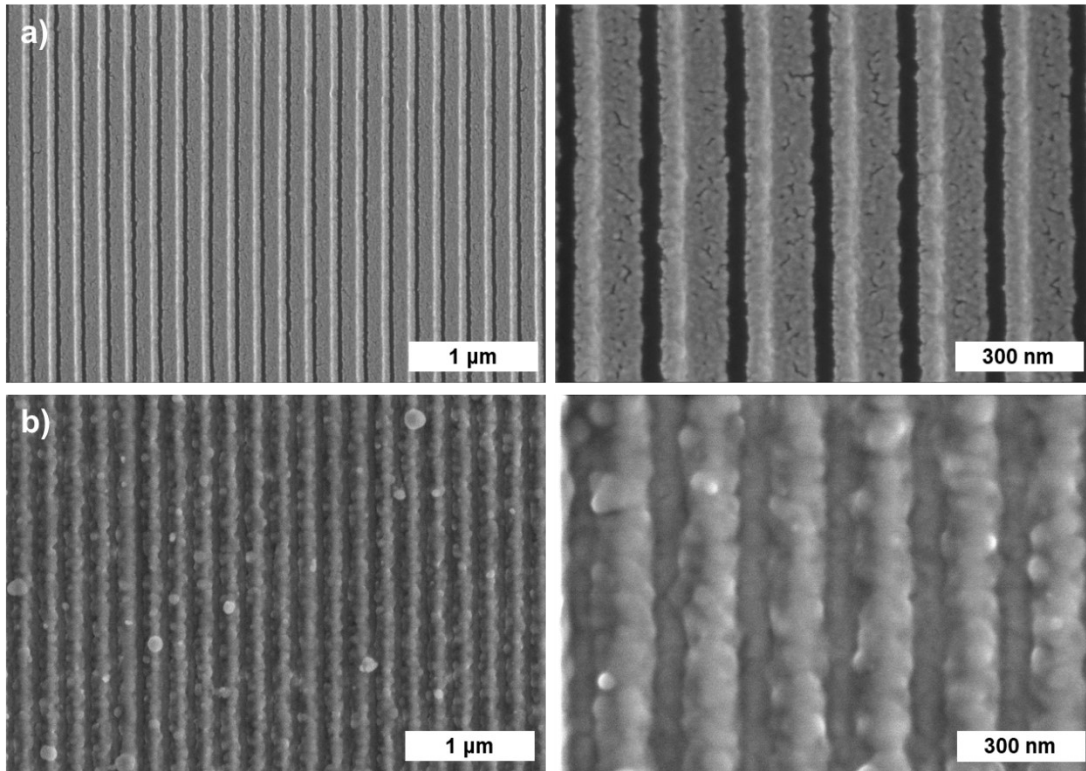

**Figure S3.** (a,b) SEM images in the absence (a) and presence (b) of 100 nM miRNA.

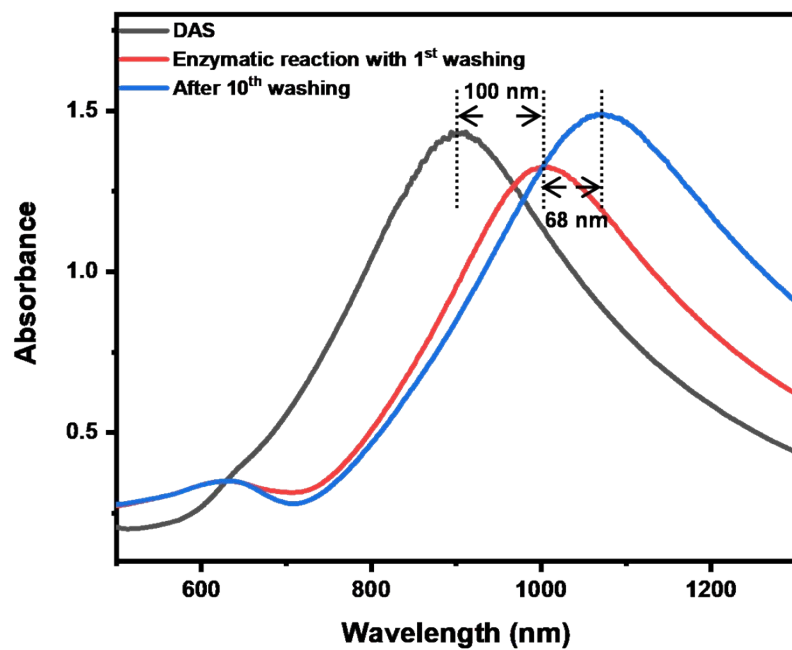

**Fig. S4** LSPR peak shift induced by repeated washing and drying after the treatment of 100 nM miRNA

125b.

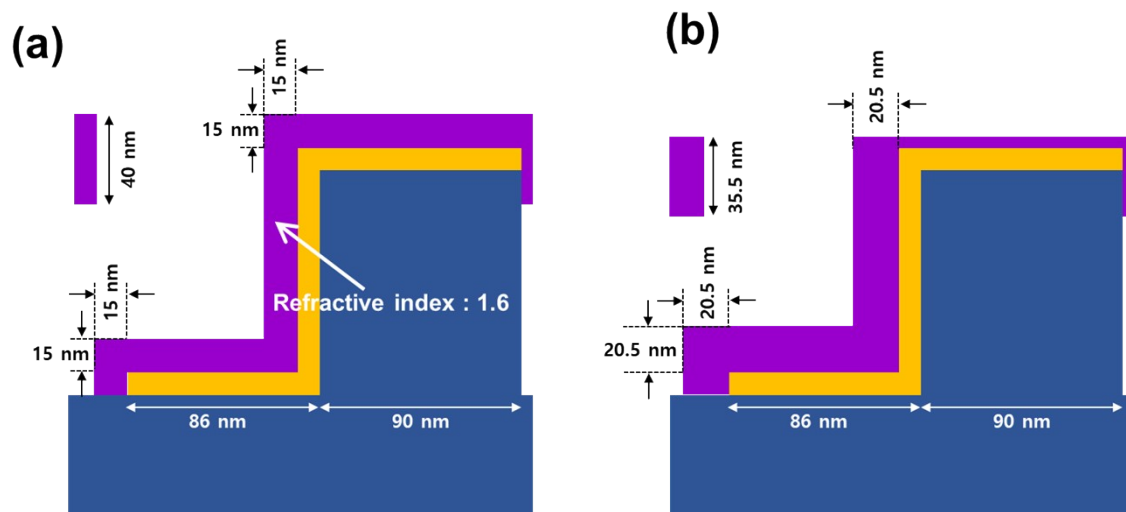

**Fig. S5** (a,b) Schematic illustration of the FDTD simulation geometries for the local electric fields around the DAS structures with organic layers.

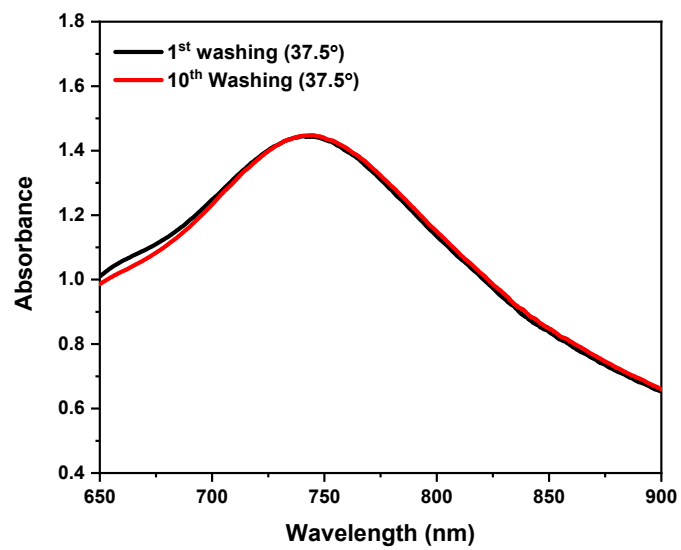

**Fig. S6** UV-Vis spectra of a DAS fabricated with Au deposition at 37.5° before and after repeated washing and drying.
